# Supplementary material for: Synthesis and characterization of a series of novel perovskite-type LaMnO3/Keggin-type polyoxometalate hybrid nanomaterials for fast and selective removal of cationic dyes from aqueous solutions
Source: Royal Society of Chemistry journal article supplement (doi:10.1039/c6dt04866h), 2017-01-01
Supplement: c6dt04866h1.pdf [file c6dt04866h1.pdf]

# **Synthesis and characterization of a series of novel provskite-type LaMnO<sub>3</sub> / Keggin-type polyoxometalate hybrid nanomaterials for fast and selective removal of cationic dyes from aqueous solution**

**Saeed Farhadi<sup>a\*</sup>, Farzaneh Mahmoudi<sup>a</sup>, Mostafa M. Amini<sup>b\*</sup>, Michal Dusek<sup>c</sup>, Marketa  
Jarosova<sup>c</sup>**

<sup>a</sup> Department of Chemistry, Lorestan University, Khoramabad 68151-44316, Iran

<sup>b</sup> Department of Chemistry, Shahid Beheshti University, Tehran 1983963113, Iran

<sup>c</sup> Institute of Physics of the Czech Academy of Sciences, Na Slovance 2, 18221 Prague 8, Czech Republic

\*Corresponding authors:

Department of Chemistry, Lorestan University, Khoramabad 68151-44316, Iran.

Tel: +98 06633120611, fax: +98 06633120618

E-mail address: sfarhadi1348@yahoo.com (Saeed Farhadi)

Department of Chemistry, Shahid Beheshti University, Tehran 1983963113, Iran

E-mail address: m-pouramini@sbu.ac.ir (Mostafa M. Amini)

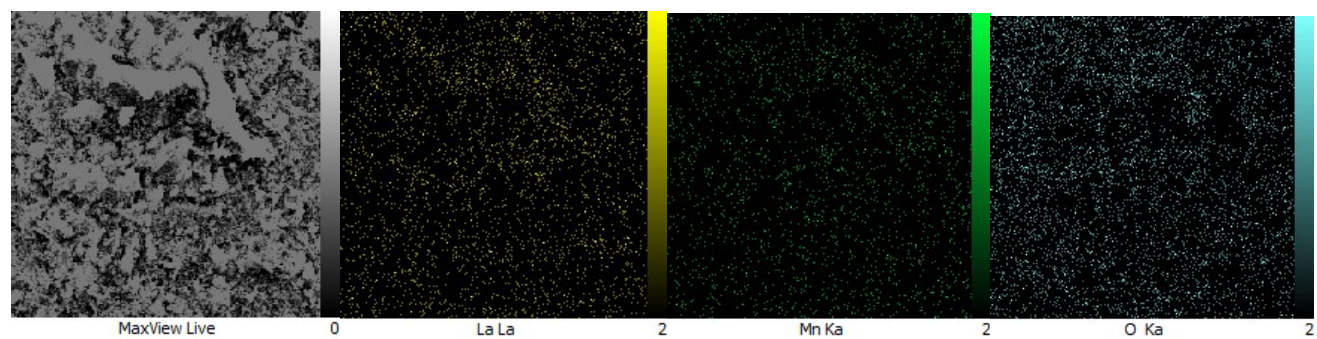

**Fig. S1.** Element mapping by SEM for  $\text{LaMnO}_3$  NPs.

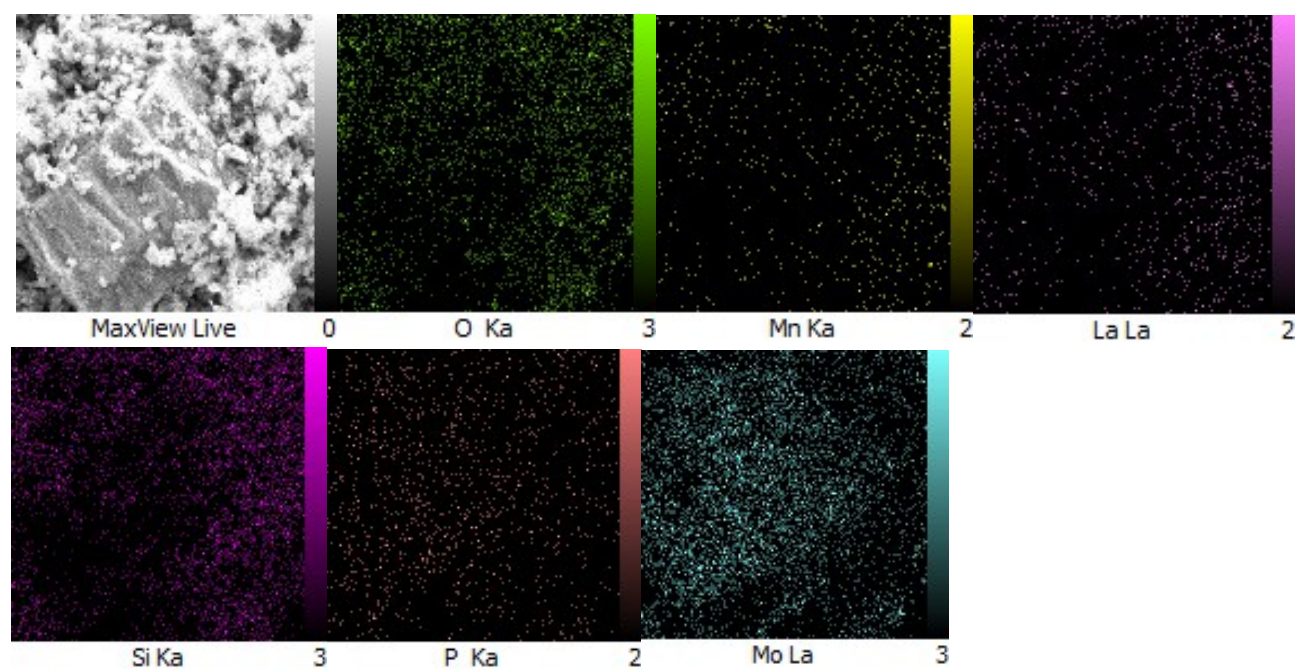

**Fig. S2.** Element mapping by SEM for hybrid material 1.

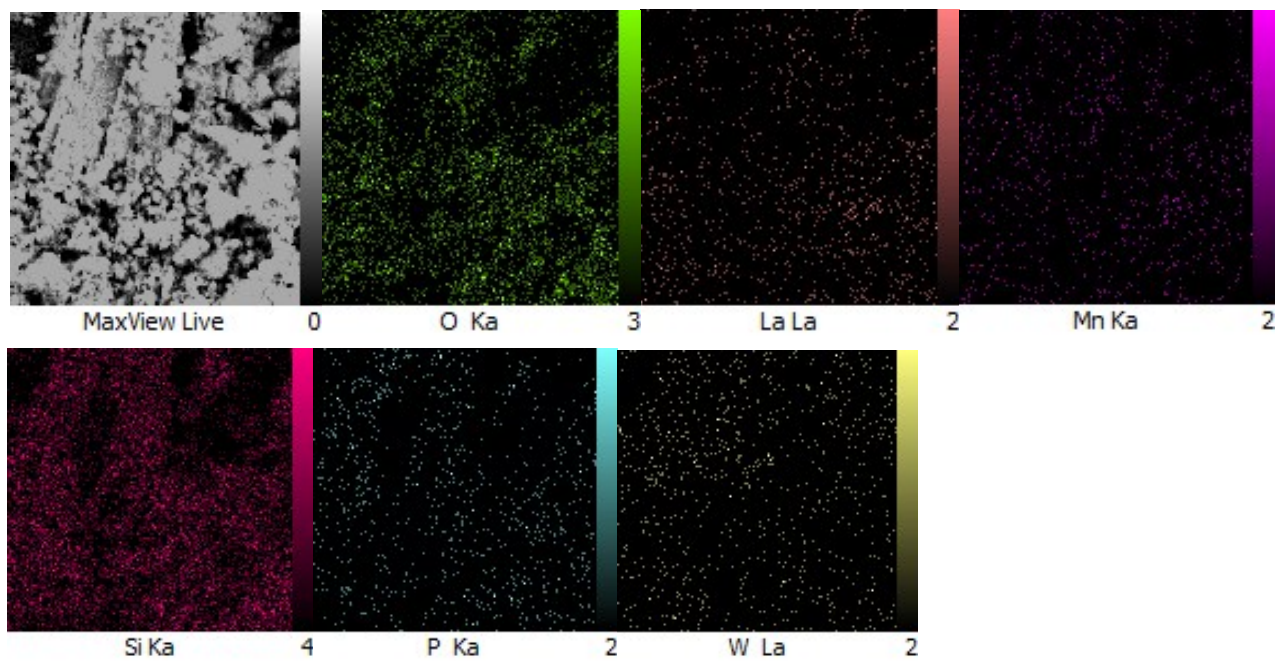

Fig. S3. Element mapping by SEM for hybrid material 2.

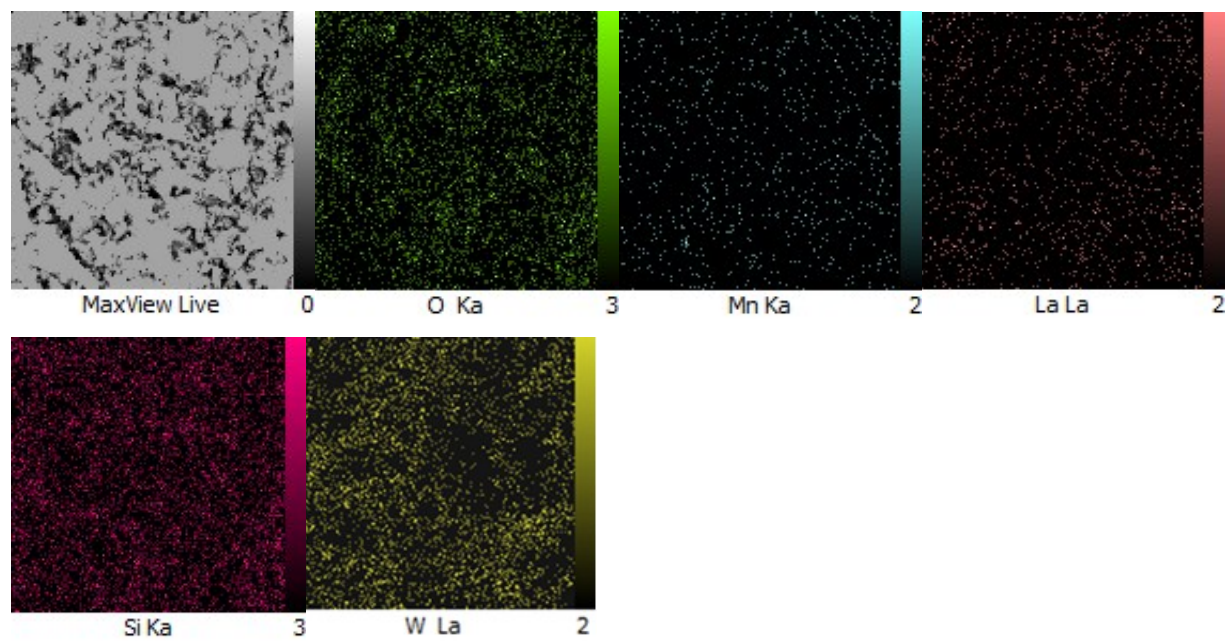

Fig. S4. Element mapping by SEM for hybrid material 3.



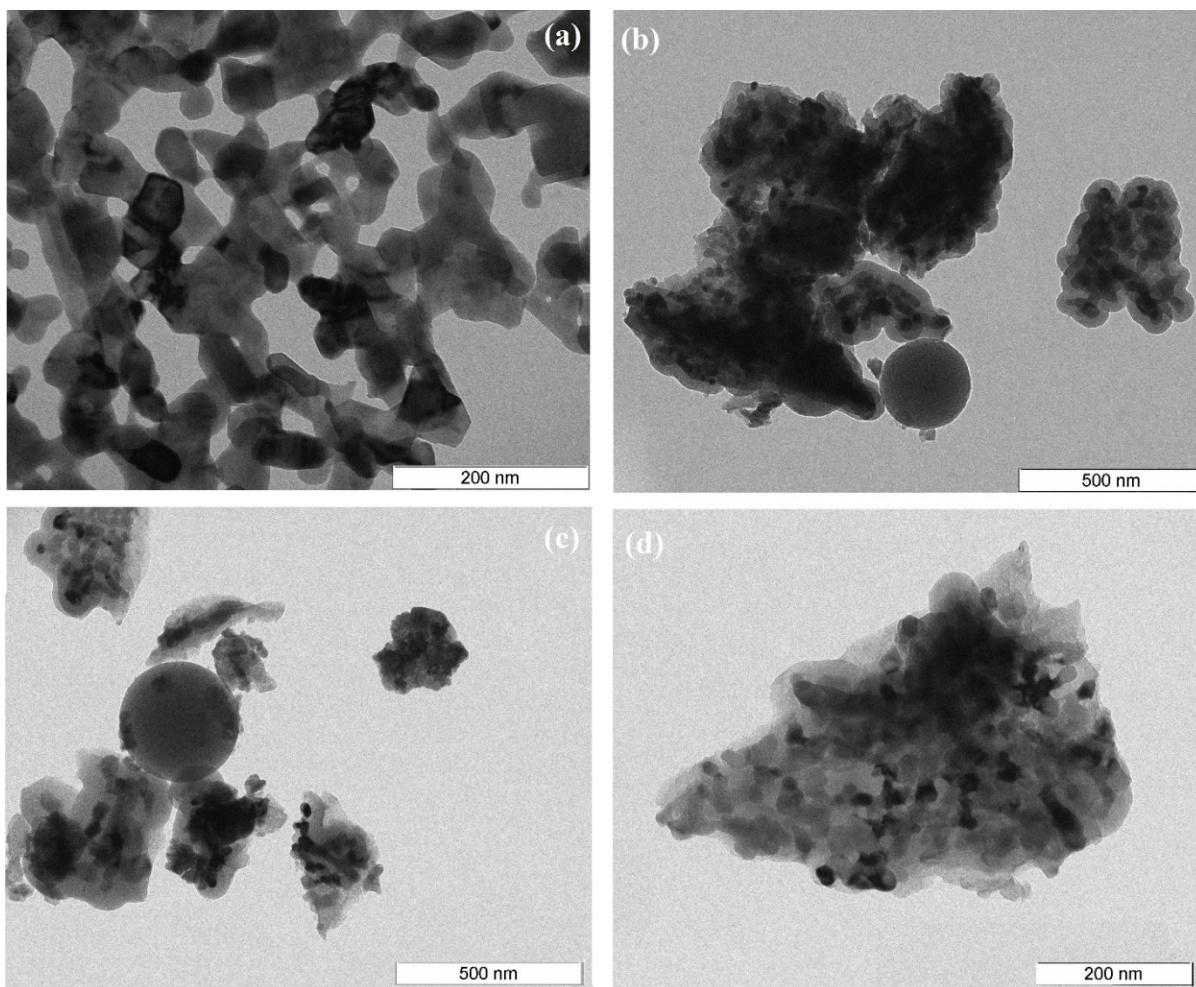

Fig. S5. TEM images of (a)  $\text{LaMnO}_3$ , (b) **1**, (c) **2** and (d) **3**.

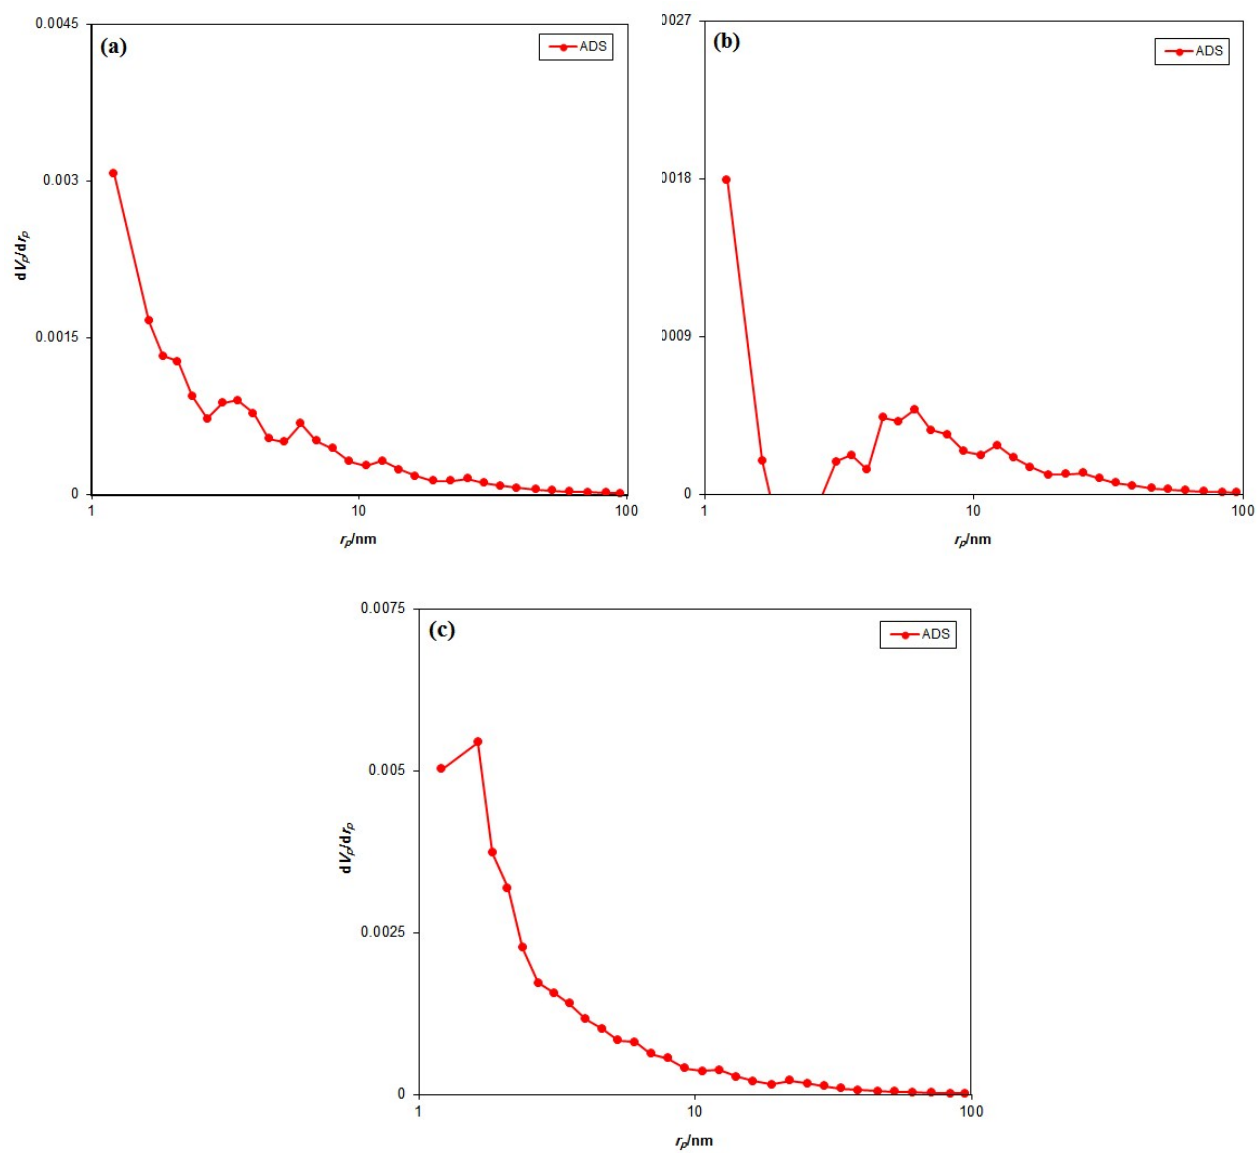

Fig. S6. The pore size distributions obtained by the BJH method for hybrid materials 1-3 (a-c)

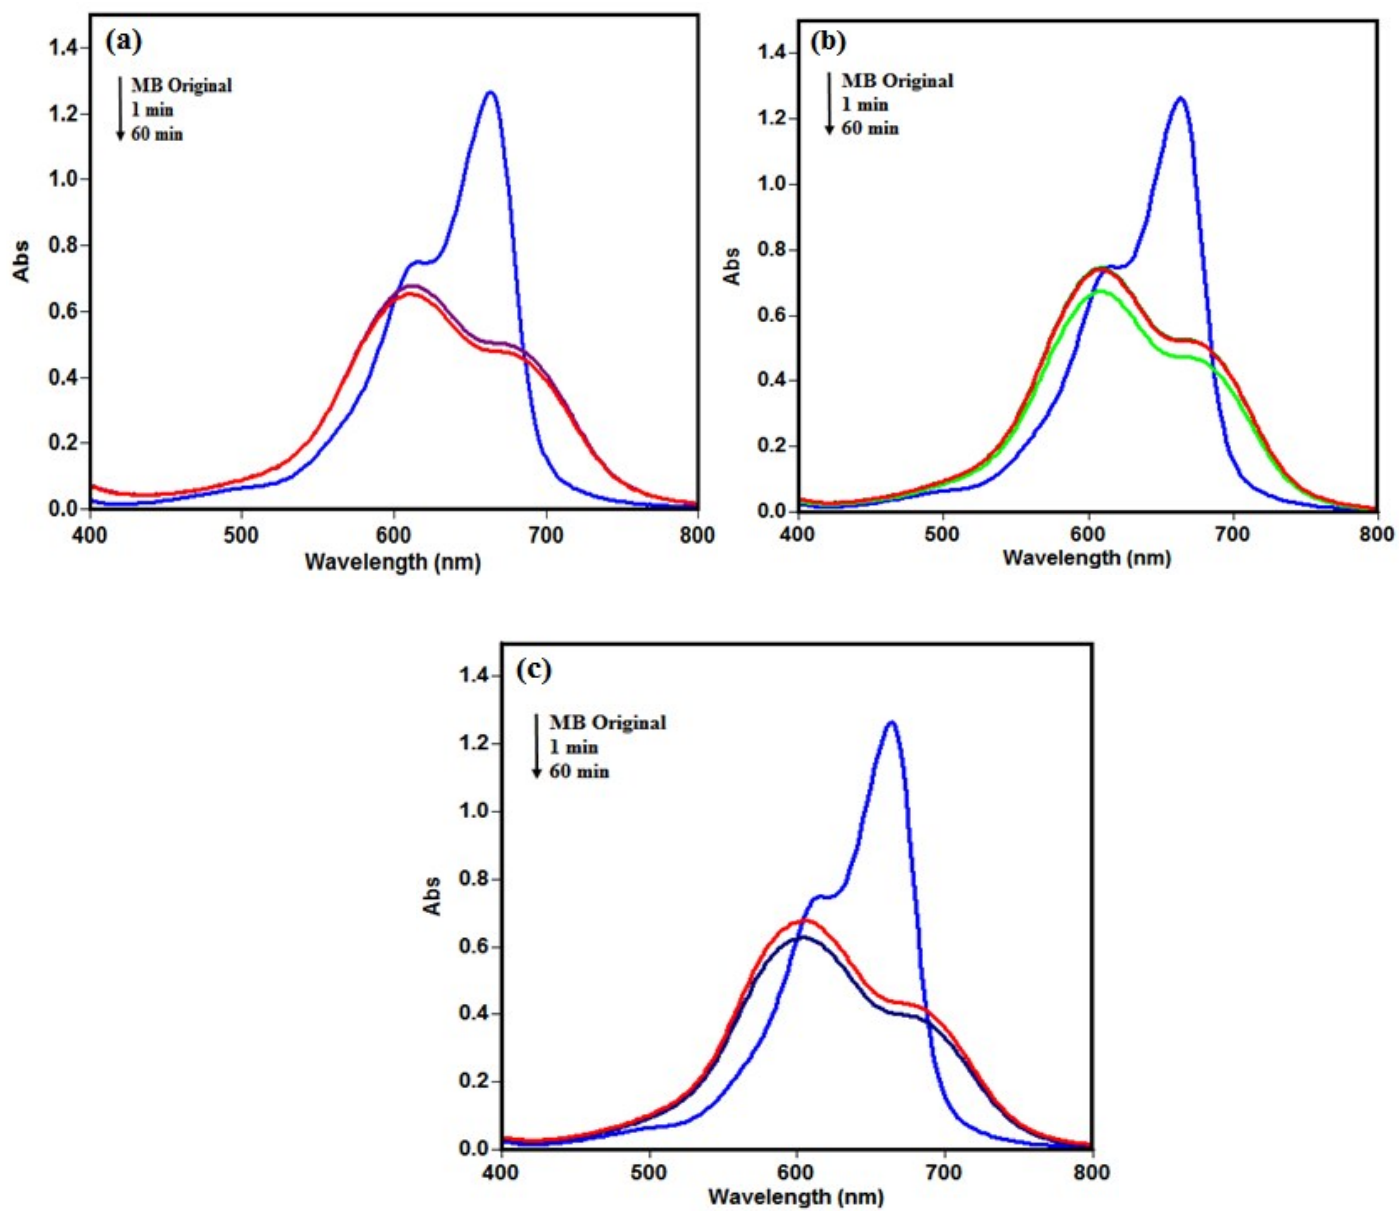

**Fig. S7.** The time dependent UV-Vis spectra during adsorption experiments of MB with (a) PMo<sub>12</sub> (b) PW<sub>12</sub>, and (c) SiW<sub>12</sub> ( $[MB] = 25 \text{ mgL}^{-1}$ , and reaction temperature = 25 °C).

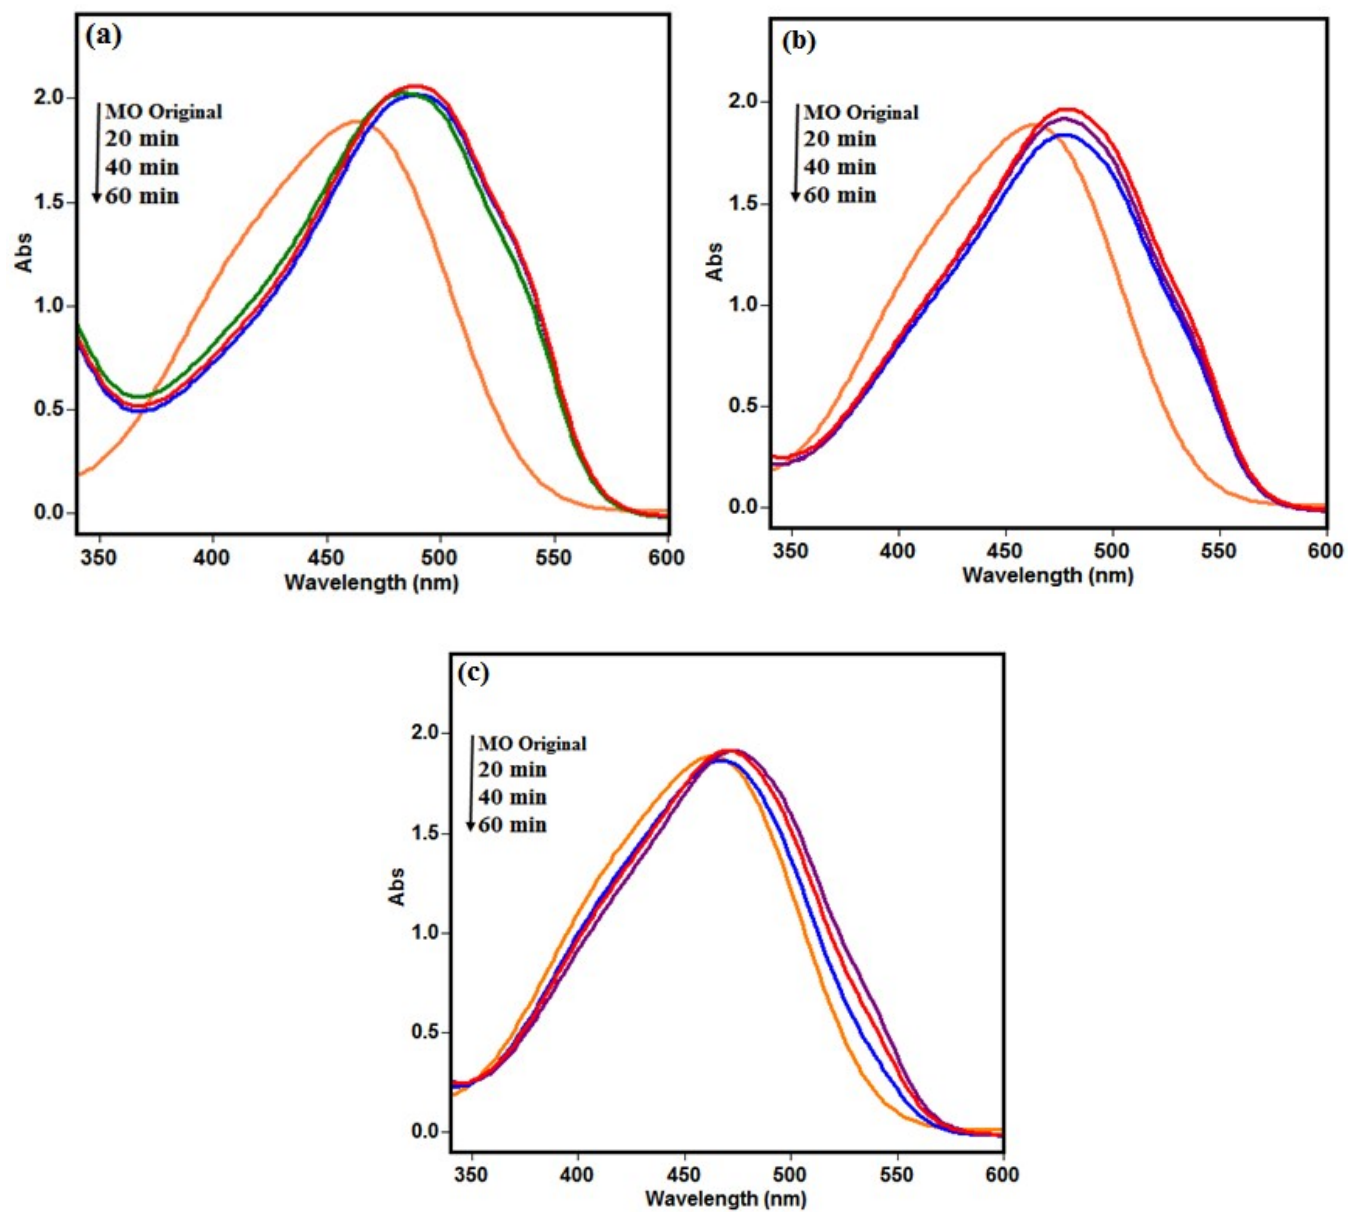

**Fig. S8.** The time dependent UV-Vis spectra during adsorption experiments of MO with (a)  $\text{PMo}_{12}$ , (b)  $\text{PW}_{12}$ , and (c)  $\text{SiW}_{12}$  ( $[\text{MO}] = 25 \text{ mgL}^{-1}$ , and reaction temperature =  $25 \text{ }^\circ\text{C}$ ).
